# Supplementary material for: Cdc42 subcellular relocation in response to VEGF/NRP1 engagement is associated with the poor prognosis of colorectal cancer
Source: PubMed Central journal article supplement (PMC7058620; doi:10.1038/s41419-020-2370-y), 2020-03-05
Supplement: 41419_2020_2370_MOESM3_ESM.pdf [file 41419_2020_2370_MOESM3_ESM.pdf]

Please complete the table below to indicate the contributions of all named authors to the figures.

Figure 1:

Yan-qing Ding, Yong-jian Deng, and Li-li Ma designed the study;  
Lan Shen, and Gui-hui Tong performed immunohistochemical staining;  
Yun li Zhang, Zhi-liang Jing, Fang-yan Jing, carried out clinical data collection and analysis.

Figure 2:

Li-li Ma, Li-li Guo, and Yang Luo performed the cell experiments;  
Guang-long Liu, Yan Lei performed the western blot analysis;  
Lan Shen, and Gui-hui Tong performed immunofluorescence staining.

Figure 3:

Li-li Ma, Li-li Guo, and Yang Luo performed the cell experiments;  
Guang-long Liu, Yan Lei, performed the western blot analysis;  
Lan Shen, and Gui-hui Tong performed immunofluorescence staining.

Figure 4:

Li-li Ma, Li-li Guo, and Yang Luo performed the cell experiments;  
Guang-long Liu, Yan Lei, performed the western blot analysis;  
Lan Shen, and Gui-hui Tong performed immunofluorescence staining.

Figure 5:

Li-li Ma, Li-li Guo, and Yang Luo performed the cell experiments;  
Guang-long Liu, Yan Lei, performed the western blot analysis;  
Lan Shen, and Gui-hui Tong performed immunofluorescence staining.

Figure 6:

Li-li Ma, Li-li Guo, and Yang Luo performed the cell experiments;  
Guang-long Liu, Yan Lei, performed the western blot analysis;  
Min-shan Tang and Yang Luo helped with the animal studies;  
Guang-long Liu, Yan Lei did the Transwell assays.

Signed for and on behalf of the Author(s):

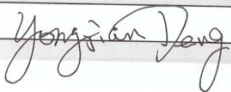

Print Name:

Yongjian Deng

Date:

2020/02/07
